# Supplementary material for: Accurate determination of sulfur isotopes (δ33S and δ34S) in sulfides and elemental sulfur by femtosecond laser ablation MC-ICP-MS with non-matrix matched calibration
Source: Royal Society of Chemistry journal article supplement (doi:10.1039/c7ja00282c), 2017-01-01
Supplement: c7ja00282c1.pdf [file c7ja00282c1.pdf]

## Electronic supplementary information

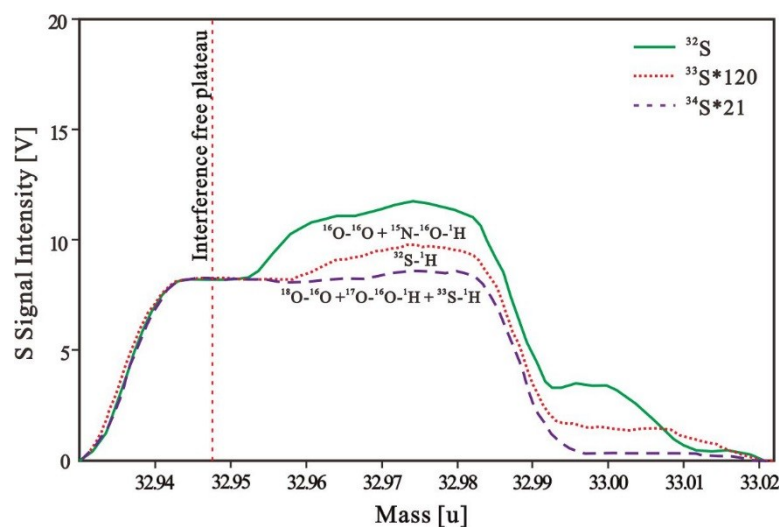

**Fig. S1** Peak shapes for  $^{32}\text{S}$ ,  $^{33}\text{S}$  and  $^{34}\text{S}$  obtained from P-S-1 with the addition of 6 ml  $\text{min}^{-1}$   $\text{N}_2$  into the central gas flow by using fs-laser. The vertical red dash line represents the interference-free plateau at the low mass side, in which S isotope ratios were determined. Polyatomic interferences of  $^{32}\text{S}$ ,  $^{33}\text{S}$  and  $^{34}\text{S}$  were indicated below the corresponding peak shape, respectively. Signal intensities of  $^{33}\text{S}$  and  $^{34}\text{S}$  were multiplied by 120 and 21 to match  $^{32}\text{S}$  signal intensity, respectively.
